# Supplementary material for: Psychedelics and the Human Receptorome
Source: PLoS One. 2010 Feb 2;5(2):e9019. doi: 10.1371/journal.pone.0009019 (PMC2814854; doi:10.1371/journal.pone.0009019)
Supplement: Table S4 — Affinity (Ki) data transformed into pKi values for thirty-five drugs at forty-two sites. Table S4 presents the raw Ki data transformed into pKi values. Higher affinities produce lower Ki values, thus it is valuable to calculate: pKi = −log10(Ki). Higher affinities have higher pKi values, and each unit of pKi value corresponds to one order of magnitude of Ki value. ND means the data is not available, and UM means that Ki was measured as >10,000 nm. Generally, the highest Ki value generated by NIMH-PDSP is 10,000, which produces a pKi value of −4 (although a value of 10,450 was reported for 5-MeO-TMT). For non-PDSP data gathered from the literature, some values greater than 10,000 are reported (i.e. 12,500, 14,142, 22,486, 39,409 and 70,000 for ibogaine). (0.04 MB XLS) [file pone.0009019.s007.xls]

## Sheet: pKiData
Compound	5ht2a	5ht2c	5ht2b	5ht1a	5ht1b	5ht1d	5ht1e	5ht5a	5ht6	5ht7	D1	D2	D3	D4	D5	Alpha1A	Alpha1B	Alpha2A	Alpha2B	Alpha2C	Beta1	Beta2	SERT	DAT	NET	Imidazoline1	Sigma1	Sigma2	DOR	KOR	MOR	M1	M2	M3	M4	M5	H1	H2	CB1	CB2	Ca+Channel	NMDA
DOB	-1.36361	-1.61805	-0.591065	-3.40654	-2.97345	-2.80312	-3.15442	-3.72518	-3.74312	-2.70441	UM	UM	-2.90752	UM	UM	UM	UM	-3.63002	-3.18384	-2.77364	-3.38471	-2.4813	-3.93136	UM	UM	-3.20306	-3.34104	UM	UM	UM	UM	UM	UM	-3.06126	UM	UM	-3.95999	UM	UM	UM	UM	UM
MDA	UM	-3.8074	-1.95904	-3.57542	UM	UM	UM	UM	UM	-3.54995	UM	UM	UM	UM	UM	UM	UM	-3.2188	-2.83904	-2.35984	UM	UM	UM	UM	UM	UM	ND	ND	ND	UM	ND	ND	UM	ND	ND	UM	ND	UM	UM	UM	ND	ND
MDMA	UM	UM	-2.69897	UM	UM	UM	UM	UM	UM	UM	UM	UM	UM	UM	UM	UM	UM	-3.40346	-3.25164	-3.12905	UM	UM	UM	UM	UM	-2.34183	ND	ND	ND	UM	UM	UM	UM	-3.26741	-3.91619	-3.8014	UM	UM	UM	ND	-3.07846	UM
Mescaline	UM	UM	-2.89916	-3.26505	UM	UM	-3.71642	UM	UM	UM	UM	UM	UM	UM	UM	UM	UM	-3.95085	UM	-2.87233	UM	UM	UM	UM	UM	-3.42775	UM	UM	UM	UM	UM	UM	UM	UM	UM	UM	UM	UM	UM	UM	UM	UM
2C-B	-1.44091	-1.95182	-1.13033	-2.38166	-2.0187	-1.41996	-2.07737	UM	-2.50501	-2.32118	UM	-3.52776	-3.85224	UM	UM	UM	UM	-2.48968	-2.82269	-2.0141	ND	ND	UM	UM	UM	-3.33351	UM	UM	UM	UM	UM	UM	UM	-2.91466	UM	UM	UM	UM	UM	UM	ND	UM
DMT	-3.36605	-2.52453	-2.03181	UM	UM	-1.96848	-2.65868	-2.78604	-2.68789	-1.94201	-2.43313	UM	UM	UM	UM	-3.2418	-2.98843	-3.1934	-2.41111	-2.41263	UM	UM	-3.5731	UM	UM	-2.81311	-3.71675	UM	ND	UM	ND	UM	UM	UM	UM	UM	ND	UM	UM	UM	UM	ND
Psilocin	-2.53097	-2.14983	-0.672098	-1.79657	-2.4843	-1.26951	-1.6464	-1.84448	-1.85552	-1.85491	-1.29885	UM	-2.00518	UM	UM	UM	UM	-3.31048	-3.10415	-3.64385	UM	UM	-2.93024	UM	UM	-2.89883	UM	UM	UM	UM	UM	UM	UM	UM	UM	ND	UM	UM	UM	UM	UM	ND
5-MeO-DMT	-3.30341	-2.73078	-3.58928	-0.278754	-1.86923	-0.799341	-2.55654	-2.44185	-1.55023	-0.591065	-1.90037	-3.55169	-2.69688	-3.49415	UM	UM	UM	-3.27646	-3.4216	-2.70595	UM	UM	-3.30792	UM	-3.45621	-3.39759	UM	UM	ND	UM	ND	UM	UM	UM	UM	UM	ND	UM	UM	UM	UM	ND
2C-E	-1.64246	-2.01745	-1.39967	-2.48756	-2.40295	-1.86451	-2.79678	UM	-3.4729	-2.629	UM	-3.52362	-3.12872	UM	UM	UM	UM	-2.69028	-2.48501	-1.95521	UM	ND	UM	UM	UM	UM	ND	UM	UM	UM	UM	UM	UM	-3.40761	UM	-3.23679	UM	UM	UM	UM	UM	UM
2C-T-2	-1.60097	-1.73159	-0.778151	-2.58115	-2.93323	-1.93399	-2.61815	UM	-3.13418	-2.98619	UM	-3.44638	-3.26364	UM	UM	UM	UM	-2.86314	-2.99202	-2.21985	-3.96388	-3.07335	UM	UM	UM	-3.31806	-3.58771	UM	UM	UM	UM	UM	UM	-2.84023	UM	-3.17667	UM	UM	UM	UM	UM	UM
Aleph-2	-1.78104	-1.70157	-0.20412	-3.22376	-3.30899	-3.18526	-3.48968	UM	-3.48001	-3.12123	UM	UM	-2.7912	UM	UM	UM	UM	-3.76365	-3.46746	-3.14239	-3.832	-1.41664	-3.11992	UM	UM	-2.50488	-2.37822	UM	UM	UM	UM	UM	UM	-3.28037	UM	-3.90407	UM	UM	UM	UM	UM	UM
MEM	-3.59638	UM	-1.80956	UM	UM	UM	UM	UM	UM	-3.85467	UM	UM	UM	UM	UM	UM	UM	UM	UM	UM	UM	UM	UM	UM	UM	UM	-3.70561	UM	UM	UM	UM	UM	UM	UM	UM	UM	UM	UM	UM	UM	UM	UM
5-MeO-MIPT	-2.65157	-3.33965	-1.76716	-1.08991	-2.48116	-1.35218	-3.54357	-2.97905	-2.11461	-1.29667	UM	UM	-3.3927	-3.80147	UM	UM	UM	-2.24304	-3.22866	-2.80414	UM	UM	-3.80679	UM	UM	-2.94419	UM	-2.9628	UM	UM	UM	UM	UM	UM	UM	UM	-3.68296	UM	ND	UM	UM	UM
DIPT	UM	UM	-2.60043	-2.08099	UM	-3.5731	UM	UM	UM	-3.53441	UM	UM	-3.52127	UM	UM	UM	UM	UM	-3.45788	-3.40192	UM	UM	-3.09968	UM	UM	-2.55145	-3.25479	-3.43169	UM	UM	UM	UM	UM	UM	UM	UM	-3.55425	UM	UM	UM	UM	UM
5-MeO-DIPT	UM	UM	-2.21219	-2.12189	-3.71071	-3.23502	UM	UM	UM	-3.09026	UM	UM	UM	UM	UM	UM	UM	UM	-3.7237	-3.45712	UM	UM	-3.40329	UM	UM	-2.88053	-3.97511	-3.47741	UM	UM	UM	UM	UM	UM	UM	UM	UM	UM	UM	UM	UM	UM
DPT	-3.41145	-3.19507	-1.62325	-1.50243	-2.93166	-2.79155	-3.36884	-3.64078	-3.65734	-2.45317	UM	-3.96609	-3.13386	-3.30406	UM	-2.94488	-2.6468	-2.66049	-2.53058	-2.7113	UM	UM	-2.19507	-3.17609	UM	-2.53148	-2.59857	-3.46494	UM	UM	UM	UM	UM	UM	UM	UM	-2.09726	UM	UM	UM	UM	UM
4C-T-2	-2.43791	-2.6708	-1.76418	-3.72746	UM	UM	-3.99471	-3.20058	UM	-3.58309	UM	UM	-3.10483	UM	UM	UM	UM	UM	UM	UM	UM	-2.09656	UM	UM	UM	-2.97612	-2.71147	UM	UM	UM	UM	UM	UM	UM	UM	UM	UM	UM	UM	UM	UM	UM
6-F-DMT	-2.93752	-2.82879	-1.47422	-2.59395	-2.33786	-1.74351	-2.66351	-2.9825	-1.40824	-1.61066	-2.73823	-2.78561	-2.93792	-3.16256	-3.79872	-2.2388	UM	UM	-2.41414	-2.1726	UM	UM	-2.16017	UM	UM	-2.95347	-3.83835	-3.85297	ND	ND	ND	UM	UM	UM	UM	UM	-1.66839	-2.96633	UM	UM	UM	UM
lisuride	-0.732394	UM	-0.462398	0.522879	-1.20412	UM	-1.6464	-0.491362	-0.863323	-0.832509	UM	-0.826075	-2.13258	-0.579784	-1.88649	-1.39094	-2.3995	-0.255273	0.30103	0.39794	-0.913814	-1.54777	UM	UM	UM	UM	ND	ND	ND	UM	UM	UM	UM	UM	UM	UM	ND	-2.05805	UM	UM	UM	ND
DOI	-2.21854	-1.66087	-2.52621	-3.34616	UM	-2.66068	-3.00561	UM	-3.3249	-3.7611	-3.98621	UM	UM	UM	UM	UM	UM	-1.86747	-2.53148	-2.77859	-2.77151	-2.14176	-2.8355	UM	UM	UM	-3.93273	-3.96246	UM	UM	UM	-3.43457	-3.29863	-3.15473	-2.7617	-3.344	-3.24477	UM	UM	UM	ND	UM
2C-B-fly	-1.06446	-1.02531	0.0457575	-2.16761	-2.26647	-0.146128	-2.041	UM	-2.17609	-2.78276	-3.69574	-3.83476	ND	UM	UM	UM	UM	-2.16077	-2.79532	-2.36791	UM	UM	UM	UM	UM	UM	UM	UM	UM	UM	UM	-2.80835	-3.30728	-2.52969	-2.716	-2.94091	-3.75989	UM	UM	-3.95299	ND	ND
DOM	-2.70535	-3.59988	-1.06819	-3.56301	UM	-2.31994	-3.54925	UM	-3.91142	-3.20167	UM	UM	UM	UM	UM	-3.50772	UM	-2.76335	-2.94136	-2.9644	UM	-1.68931	UM	UM	UM	UM	UM	UM	UM	UM	UM	UM	UM	ND	ND	UM	UM	UM	UM	UM	ND	UM
TMA	UM	-3.66271	-2.67815	-3.22479	-3.45564	-3.48216	-3.5275	UM	UM	-2.87454	UM	UM	UM	UM	UM	UM	UM	-3.31618	UM	-3.70018	UM	UM	UM	UM	UM	UM	-2.72957	-2.72957	UM	UM	UM	ND	UM	ND	ND	UM	UM	UM	UM	UM	ND	UM
DOET	-1.43616	-2.03019	-1.45939	-1.15836	-3.44738	-3.82053	-3.55047	UM	UM	-3.08814	UM	UM	UM	UM	UM	UM	UM	-3.10619	-2.75861	-3.16047	-3.75762	-3.34143	UM	UM	UM	UM	-3.99034	-3.98046	UM	UM	UM	ND	UM	ND	ND	UM	UM	UM	UM	UM	ND	UM
TMA-2	-2.76656	-3.60874	-2.18865	UM	UM	UM	UM	UM	UM	UM	UM	UM	UM	UM	UM	UM	UM	UM	UM	UM	UM	UM	UM	UM	UM	ND	ND	ND	ND	ND	ND	ND	UM	ND	ND	UM	-3.14829	UM	ND	ND	ND	ND
LSD	-1.05308	-1.48572	-1.47712	-0.863323	-0.591065	-0.892095	-1.96802	-0.954243	-0.838849	-0.819544	-2.24797	-2.04179	-1.43136	-2.19976	-2.53706	-3.05219	-3.93837	-1.66087	ND	ND	-3.20431	-3.53919	UM	UM	UM	ND	ND	ND	UM	UM	UM	ND	ND	ND	ND	ND	-3.18851	ND	ND	ND	ND	ND
cis-2a	-1.47276	-2.02366	-1.64345	-0.361728	-0.568202	ND	-2.28914	-1.21484	-1.11059	-1.06446	-2.36549	-1.69108	-0.90309	-1.8704	-3.00561	-2.72329	UM	ND	ND	ND	-2.59977	-3.6638	UM	UM	UM	ND	ND	ND	UM	UM	UM	ND	ND	ND	ND	ND	-2.70018	ND	ND	ND	ND	ND
RR-2b	-2.83879	-2.67367	-2.49415	-0.716003	-0.30103	-1.25527	-2.13925	-1.1038	-1.78176	-1.48996	-2.53403	-2.42111	-1.89763	-2.22557	-2.77225	-3.71492	UM	ND	ND	ND	ND	ND	UM	UM	UM	ND	ND	ND	UM	UM	UM	ND	ND	ND	ND	ND	-3.16026	ND	ND	ND	ND	ND
SS-2c	-1.2833	-1.5682	-1.43136	0.39794	-0.380211	ND	-2.44059	-1.43616	-1.16137	-1.15534	-2.46538	-1.86688	-0.778151	-1.98	-2.60444	-2.92952	UM	ND	ND	ND	-1.87967	-3.02898	UM	UM	UM	ND	ND	ND	UM	UM	UM	ND	ND	ND	ND	ND	-3.3986	ND	ND	ND	ND	ND
5-MeO-TMT	UM	-3.60423	ND	-2.30103	ND	-2.39794	-3.25527	-4.01912	-1.77815	-2.16137	UM	UM	UM	UM	UM	ND	ND	ND	ND	ND	ND	ND	UM	UM	-3.80482	ND	ND	ND	UM	UM	UM	ND	ND	ND	ND	ND	UM	UM	ND	ND	ND	ND
EMDT	UM	-3.25768	ND	-2.23045	ND	-2.4624	-2.716	-3.66464	-1.20412	-2.47712	UM	UM	UM	UM	UM	ND	ND	ND	ND	ND	ND	ND	UM	UM	UM	ND	ND	ND	UM	UM	UM	ND	ND	ND	ND	ND	UM	UM	ND	ND	ND	ND
Ibogaine	-4.15051	UM	ND	UM	UM	UM	ND	ND	ND	ND	UM	UM	-4.8451	ND	ND	ND	ND	ND	ND	ND	UM	ND	-2.73933	-3.29667	ND	ND	-3.76634	-2.31387	UM	-3.43409	-3.63969	-4.35191	-4.5956	-4.09691	ND	ND	UM	ND	ND	ND	ND	-3.30125
Salvinorin_A	UM	UM	UM	UM	UM	UM	UM	UM	UM	UM	UM	UM	UM	UM	UM	UM	UM	ND	ND	ND	UM	UM	UM	UM	ND	ND	ND	ND	UM	-0.633468	UM	UM	UM	UM	UM	UM	UM	ND	ND	ND	ND	ND
Morphine	ND	ND	ND	ND	ND	ND	ND	ND	ND	ND	ND	ND	ND	ND	ND	ND	ND	ND	ND	ND	ND	ND	ND	ND	ND	ND	ND	ND	-3.18893	-1.69897	0.091515	ND	ND	ND	ND	ND	ND	ND	ND	ND	ND	ND
THC	ND	ND	ND	ND	ND	ND	ND	ND	ND	ND	ND	ND	ND	ND	ND	ND	ND	ND	ND	ND	ND	ND	ND	ND	ND	ND	ND	ND	ND	ND	ND	ND	ND	ND	ND	ND	ND	ND	-1.00817	-1.2266	ND	ND
