# Supplementary material for: Psychedelics and the Human Receptorome
Source: PLoS One. 2010 Feb 2;5(2):e9019. doi: 10.1371/journal.pone.0009019 (PMC2814854; doi:10.1371/journal.pone.0009019)
Supplement: Table S6 — Table of npKi, Bsq, or npKimax values at individual or groups of receptors for thirty-five drugs. Table S6 presents the normalized pKi data (npKi) for thirty five drugs at forty-two receptors, transporters and ion channels. In addition, it presents the three breadth statistics (B, Bsq, Bexp) for each drug across all forty-two sites, the breadth statistic Bsq for sixteen groups of related sites, and the maximum npKi value for thirteen groups of related sites. A useful way to work with the table is to choose a column, and sort the data on that column (click “Data, “Sort,” select “Header row,” choose the column from the “Sort by” drop down and select “Descending,” finally clicking “OK”). Missing values are reported as “ND.” Values of 0.0000 correspond to Ki values of >10,000. Receptors in a group are listed in the column headings using the following abbreviations: • B - sum of npKi values across forty-two receptors • Bsq - square root of sum of squares of npKi values across forty-two receptors • Bexp - log of sum of exponents of npKi values across forty-two receptors • 5ht - 5-HT1A, 5-HT1B, 5-HT1D, 5-HT1E, 5-HT2A, 5-HT2B, 5-HT2C, 5-HT5A, 5-HT6, 5-HT7 • 5ht1 - 5-HT1A, 5-HT1B, 5-HT1D, 5-HT1E • 5ht1max - maximum of 5-HT1A, 5-HT1B, 5-HT1D, 5-HT1E • 5ht2 - 5-HT2A, 5-HT2B, 5-HT2C • 5ht2max - maximum of 5-HT2A, 5-HT2B, 5-HT2C • 5ht2[ac] - 5-HT2A, 5-HT2C • 5ht2[ac]max - maximum of 5-HT2A, 5-HT2C • 5ht[67] - 5-HT6, 5-HT7 • D[1–5] - D1, D2, D3, D4, D5 • D[1–5]max - maximum of D1, D2, D3, D4, D5 • ∧[AB] - α1A, α1B, α2A, α2B, α2C, β1, β2 • ∧[AB]max - maximum of α1A, α1B, α2A, α2B, α2C, β1, β2 • Alpha1 - α1A, α1B • Alpha1max - maximum of α1A, α1B • Alpha2 - α2A, α2B, α2C • Alpha2max - maximum of α2A, α2B, α2C • Beta - β1, β2 • BetaMax - maximum of β1, β2 • M[1–5] - M1, M2, M3, M4, M5 • M[1–5]max - maximum of M1, M2, M3, M4, M5 • Sigma - σ1, σ 2 • SigmaMax - maximum of σ1, σ 2 • H[12] - H1, H2 • H[1–2]max - maximum of H1, H2 • T$ - SERT, DAT, NET • T$max - maximum of SERT, DAT, NET [file pone.0009019.s009.xls]

## Sheet: Breadth
Drug	B	Bsq	Bexp	5ht	5ht1	5ht1max	5ht2	5ht2max	5ht2[ac]	5ht2[ac]max	5ht[67]	D[1-5]	D[1-5]max	^[AB]	^[AB]max	Alpha1	Alpha1max	Alpha2	Alpha2max	Beta	BetaMax	M[1-5]	M[1-5]max	Sigma	SigmaMax	H[12]	H[1-2]max	T$	T$max	[DKM]OR	[DKM]ORmax	CB[12]	5ht2a	5ht2c	5ht2b	5ht1a	5ht1b	5ht1d	5ht1e	5ht5a	5ht6	5ht7	D1	D2	D3	D4	D5	Alpha1A	Alpha1B
DOM	28.1016	8.29457	5.10352	6.3786	3.48218	2.74825	4.87226	4	2.78189	2.36284	2.1959	0	0	5.30221	3.37888	1.56046	1.56046	3.77645	2.30483	3.37888	3.37888	ND	ND	0	0	0	0	0	0	0	0	0	2.36284	1.4683	4	1.50518	0	2.74825	1.51894	0	1.15676	1.86652	0	0	0	0	0	1.56046	0
lisuride	50.5415	11.8799	5.84944	7.99255	4.95157	4	4.07702	3.01472	2.74473	2.74473	3.71832	4.44528	2.89734	7.4483	3.87506	2.34807	2.08619	6.29848	3.87506	3.20826	2.56331	0	0	ND	ND	ND	ND	0	0	ND	ND	0	2.74473	0	3.01472	4	2.273	0	1.83072	2.98576	2.6138	2.64461	0	2.65105	1.34454	2.89734	1.59063	2.08619	1.07762
TMA-2	13.0423	6.60381	4.78198	5.8623	0	0	5.8623	4	4.28563	3.42209	0	0	0	0	0	0	0	0	0	0	0	ND	ND	ND	ND	3.04035	3.04035	0	0	ND	ND	ND	3.42209	2.57991	4	0	0	0	0	0	0	0	0	0	0	0	0	0	0
TMA	38.0787	11.5484	5.93108	9.05603	6.51547	3.45336	5.00928	4	3.01544	3.01544	3.80361	0	0	4.49123	3.36197	0	0	4.49123	3.36197	0	0	ND	ND	5.58414	3.94858	0	0	0	0	0	0	0	0	3.01544	4	3.45336	3.22252	3.196	3.15065	0	0	3.80361	0	0	0	0	0	0	0
LSD	56.4279	13.1199	6.1211	11.1286	7.10344	4	5.64421	3.53799	4.70749	3.53799	5.3201	5.64888	3.1597	ND	ND	1.67157	1.53887	ND	ND	1.74055	1.38675	ND	ND	ND	ND	ND	ND	0	0	0	0	ND	3.53799	3.10534	3.11394	3.72774	4	3.69897	2.62305	3.63682	3.75222	3.77152	2.34309	2.54928	3.1597	2.39131	2.054	1.53887	0.652695
2C-B	43.8838	11.3654	5.76692	9.73773	6.3502	3.71038	6.30197	4	4.86978	3.68942	3.84495	2.04982	1.60258	ND	ND	0	0	4.6914	3.11623	ND	ND	2.21567	2.21567	0	0	0	0	0	0	0	0	0	3.68942	3.17851	4	2.74868	3.11163	3.71038	3.05297	0	2.62532	2.80915	0	1.60258	1.2781	0	0	0	0
DMT	54.2652	13.3372	6.15589	9.83478	5.15453	3.97353	5.79693	3.9102	4.27957	3.41748	5.15648	3.50888	3.50888	6.96372	3.53089	4.00185	2.95358	5.699	3.53089	0	0	0	0	2.22525	2.22525	ND	ND	2.3689	2.3689	ND	ND	0	2.57596	3.41748	3.9102	0	0	3.97353	3.28333	3.15597	3.25412	4	3.50888	0	0	0	0	2.70021	2.95358
5-MeO-TMT	22.9033	8.40693	5.23547	ND	ND	ND	ND	ND	2.17393	2.17393	5.39269	0	0	ND	ND	ND	ND	ND	ND	ND	ND	ND	ND	ND	ND	0	0	1.97333	1.97333	0	0	ND	0	2.17393	ND	3.47712	ND	3.38021	2.52288	1.75903	4	3.61678	0	0	0	0	0	ND	ND
2C-E	45.2542	11.6061	5.80799	9.46986	6.06079	3.53516	6.4464	4	5.0553	3.75721	3.37477	2.94564	2.27095	ND	ND	0	0	5.26312	3.44447	ND	ND	2.94047	2.16288	ND	ND	0	0	0	0	0	0	0	3.75721	3.38222	4	2.91211	2.99672	3.53516	2.60289	0	1.92677	2.77067	0	1.87606	2.27095	0	0	0	0
SS-2c	33.4469	8.84768	5.22118	ND	ND	4	3.77162	2.31876	3.08435	2.31876	3.45593	3.98794	2.82391	ND	ND	0.672539	0.672539	ND	ND	1.81523	1.72239	ND	ND	ND	ND	ND	ND	0	0	0	0	ND	2.31876	2.03386	2.1707	4	3.22185	ND	1.16147	2.1659	2.44069	2.44672	1.13668	1.73518	2.82391	1.62206	0.997618	0.672539	0
5-MeO-MIPT	45.226	11.0001	5.70141	9.32275	6.25838	4	4.47767	3.32275	3.00148	2.43834	4.8209	2.13086	1.69721	4.098	2.84687	0	0	4.098	2.84687	0	0	0	0	2.12711	2.12711	1.40695	1.40695	1.28311	1.28311	0	0	ND	2.43834	1.75025	3.32275	4	2.60875	3.73772	1.54633	2.11086	2.97529	3.79324	0	0	1.69721	1.28843	0	0	0
EMDT	18.4164	7.22119	4.85723	ND	ND	ND	ND	ND	1.94644	1.94644	4.84113	0	0	ND	ND	ND	ND	ND	ND	ND	ND	ND	ND	ND	ND	0	0	0	0	0	0	ND	0	1.94644	ND	2.97367	ND	2.74172	2.48812	1.53948	4	2.727	0	0	0	0	0	ND	ND
DOET	33.2897	9.32136	5.41302	8.05674	4.82727	4	6.10922	3.7222	4.86212	3.7222	2.07023	0	0	4.38464	2.39975	0	0	3.73655	2.39975	2.29419	1.81693	ND	ND	1.65884	1.1779	0	0	0	0	0	0	0	3.7222	3.12817	3.69897	4	1.71099	1.33783	1.60789	0	0	2.07023	0	0	0	0	0	0	0
Mescaline	21.1024	8.6694	5.38445	6.22561	4.79293	3.60728	3.97317	3.97317	0	0	0	0	0	4.95329	4	0	0	4.95329	4	0	0	0	0	0	0	0	0	0	0	0	0	0	0	0	3.97317	3.60728	0	0	3.15591	0	0	0	0	0	0	0	0	0	0
MDA	20.4038	7.89383	5.07437	5.66701	2.38362	2.38362	4.54198	4	2.15164	2.15164	2.40909	0	0	5.49524	3.59921	0	0	5.49524	3.59921	0	0	ND	ND	ND	ND	ND	ND	0	0	ND	ND	0	0	2.15164	4	2.38362	0	0	0	0	0	2.40909	0	0	0	0	0	0	0
2C-T-2	40.5205	9.65316	5.36242	7.89146	4.58098	2.84416	5.94777	4	4.40182	3.17718	2.43183	2.01677	1.51452	4.11969	2.5583	0	0	3.66093	2.5583	1.88928	1.7048	2.51402	1.93792	1.19044	1.19044	0	0	0	0	0	0	0	3.17718	3.04656	4	2.197	1.84492	2.84416	2.16	0	1.64397	1.79196	0	1.33177	1.51452	0	0	0	0
4C-T-2	31.1382	9.63624	5.44122	7.43246	2.698	2.03672	6.05252	4	4.54236	3.32627	2.18109	2.65935	2.65935	3.66761	3.66761	0	0	0	0	3.66761	3.66761	0	0	3.05271	3.05271	0	0	0	0	0	0	0	3.32627	3.09337	4	2.03672	0	0	1.76946	2.5636	0	2.18109	0	0	2.65935	0	0	0	0
6-F-DMT	67.5288	14.1945	6.22189	10.1416	6.18961	3.66473	5.31362	3.93402	3.57184	2.57945	5.51558	5.26719	2.67001	5.42949	3.23564	3.16944	3.16944	4.4084	3.23564	0	0	0	0	2.20985	1.56989	4.46648	3.73985	3.24807	3.24807	ND	ND	0	2.47072	2.57945	3.93402	2.81429	3.07038	3.66473	2.74473	2.42574	4	3.79758	2.67001	2.62263	2.47032	2.24568	1.60952	3.16944	0
2C-B-fly	32.5454	8.67079	5.28722	7.85281	4.91964	3.80811	5.73843	4	4.11455	2.92894	2.12936	ND	ND	2.66009	1.79347	0	0	2.66009	1.79347	0	0	2.51417	1.42456	0	0	0.194348	0.194348	0	0	0	0	0.00125644	2.88978	2.92894	4	1.78663	1.68778	3.80811	1.91324	0	1.77815	1.17148	0.258498	0.119485	ND	0	0	0	0
MDMA	28.1881	9.49815	5.43931	3.64286	0	0	3.64286	3.64286	0	0	0	0	0	5.33903	3.21278	0	0	5.33903	3.21278	0	0	4.66793	3.07442	ND	ND	0	0	0	0	ND	ND	ND	0	0	3.64286	0	0	0	0	0	0	0	0	0	0	0	0	0	0
THC	7.78157	5.50457	4.58989	ND	ND	ND	ND	ND	ND	ND	ND	ND	ND	ND	ND	ND	ND	ND	ND	ND	ND	ND	ND	ND	ND	ND	ND	ND	ND	ND	ND	5.50457	ND	ND	ND	ND	ND	ND	ND	ND	ND	ND	ND	ND	ND	ND	ND	ND	ND
Psilocin	42.1295	10.7069	5.59798	9.19776	5.8127	3.40258	5.19098	4	3.30851	2.52226	3.98367	4.30014	3.37324	2.31728	1.56795	0	0	2.31728	1.56795	0	0	ND	ND	0	0	0	0	1.74186	1.74186	0	0	0	2.14113	2.52226	4	2.87552	2.1878	3.40258	3.02569	2.82762	2.81658	2.81718	3.37324	0	2.66692	0	0	0	0
5-MeO-DIPT	32.0535	9.84762	5.49317	7.39083	5.4907	4	3.9097	3.9097	0	0	3.03163	0	0	3.585	2.66476	0	0	3.585	2.66476	0	0	0	0	3.40616	2.64448	0	0	2.7186	2.7186	0	0	0	0	0	3.9097	4	2.41118	2.88686	0	0	0	3.03163	0	0	0	0	0	0	0
Morphine	6.92907	4.62598	4.18606	ND	ND	ND	ND	ND	ND	ND	ND	ND	ND	ND	ND	ND	ND	ND	ND	ND	ND	ND	ND	ND	ND	ND	ND	ND	ND	4.62598	4	ND	ND	ND	ND	ND	ND	ND	ND	ND	ND	ND	ND	ND	ND	ND	ND	ND	ND
Salvinorin_A	4	4	4	0	0	0	0	0	0	0	0	0	0	ND	ND	0	0	ND	ND	0	0	0	0	ND	ND	ND	ND	ND	ND	4	4	ND	0	0	0	0	0	0	0	0	0	0	0	0	0	0	0	0	0
RR-2b	37.5981	9.80036	5.43959	8.67898	6.54235	4	2.83748	1.80688	2.1878	1.62736	3.77477	4.36778	2.4034	ND	ND	0.586114	0.586114	ND	ND	ND	ND	ND	ND	ND	ND	ND	ND	0	0	0	0	ND	1.46224	1.62736	1.80688	3.58503	4	3.04576	2.16178	3.19723	2.51927	2.81107	1.767	1.87992	2.4034	2.07546	1.52878	0.586114	0
DPT	63.5212	13.3032	6.02164	8.68459	5.87451	4	4.97434	3.87918	3.11385	2.30736	3.56403	3.57816	2.36857	6.27651	2.97184	3.8335	2.85563	4.9698	2.97184	0	0	0	0	3.54736	2.90386	3.40517	3.40517	4.04357	3.30736	0	0	0	2.09098	2.30736	3.87918	4	2.57077	2.71088	2.13358	1.86165	1.84508	3.04926	0	1.53633	2.36857	2.19837	0	2.55755	2.85563
Aleph-2	26.986	7.29733	4.94072	5.75691	1.81958	1.01886	5.30416	4	3.4834	2.50255	1.30268	1.41292	1.41292	3.12609	2.78748	0	0	1.36527	1.06173	2.81221	2.78748	0.971257	0.923747	1.8259	1.8259	0	0	1.0842	1.0842	0	0	0	2.42308	2.50255	4	0.980365	0.895129	1.01886	0.714443	0	0.724113	1.08289	0	0	1.41292	0	0	0	0
DIPT	34.91	10.2096	5.5245	6.39444	4.72117	4	3.48056	3.48056	0	0	2.54658	2.55972	2.55972	3.74941	2.67907	0	0	3.74941	2.67907	0	0	0	0	3.87378	2.8262	2.52674	2.52674	2.98131	2.98131	0	0	0	0	0	3.48056	4	0	2.50788	0	0	0	2.54658	0	0	2.55972	0	0	0	0
5-MeO-DMT	34.6557	9.00172	5.35561	8.06964	6.07274	4	1.95522	1.54797	1.82962	1.54797	4.58736	3.05012	2.37839	2.05256	1.5728	0	0	2.05256	1.5728	0	0	0	0	0	0	ND	ND	1.27243	0.97083	ND	ND	0	0.975342	1.54797	0.689474	4	2.40952	3.47941	1.72221	1.8369	2.72853	3.68769	2.37839	0.72706	1.58187	0.784599	0	0	0
DOB	34.4717	8.4365	5.16435	7.04017	3.04639	1.78795	5.93762	4	4.38808	3.22745	2.06845	1.68355	1.68355	3.48042	2.10977	0	0	2.49137	1.81742	2.43031	2.10977	1.5298	1.5298	1.25003	1.25003	0.63107	0.63107	0.659708	0.659708	0	0	0	3.22745	2.97302	4	1.18452	1.61761	1.78795	1.43664	0.865888	0.847947	1.88666	0	0	1.68355	0	0	0	0
DOI	61.6497	13.2083	6.02127	8.25536	4.62703	3.00019	6.13805	4	5.27728	4	3.01095	1.67465	1.67465	7.2954	3.7934	0	0	5.70004	3.7934	4.55329	3.5191	5.53085	2.89916	2.42302	1.72814	2.41609	2.41609	2.82537	2.82537	0	0	0	3.44233	4	3.13466	2.31471	0	3.00019	2.65526	0	2.33597	1.89976	1.67465	0	0	0	0	0	0
Ibogaine	31.2352	9.3512	5.35209	ND	ND	ND	ND	ND	2.16336	2.16336	ND	ND	ND	ND	ND	ND	ND	ND	ND	ND	ND	ND	ND	4.74235	4	ND	ND	ND	ND	3.92993	2.87978	ND	2.16336	0	ND	0	0	0	ND	ND	ND	ND	0	0	1.46877	ND	ND	ND	ND
cis-2a	45.2395	11.2869	5.75054	ND	ND	4	4.60453	2.88897	3.71654	2.88897	4.63054	5.579	3.45864	ND	ND	1.63844	1.63844	ND	ND	1.89515	1.76195	ND	ND	ND	ND	ND	ND	0	0	0	0	ND	2.88897	2.33806	2.71828	4	3.79353	ND	2.07259	3.14688	3.25114	3.29727	1.99624	2.67065	3.45864	2.49132	1.35612	1.63844	0
MEM	10.272	5.39874	4.36951	4.9719	0	0	4.57145	4	2.21318	2.21318	1.95489	0	0	0	0	0	0	0	0	0	0	0	0	2.10395	2.10395	0	0	0	0	0	0	0	2.21318	0	4	0	0	0	0	0	0	1.95489	0	0	0	0	0	0	0
[truncated: 25 more columns]
