# Supplementary material for: Psychedelics and the Human Receptorome
Source: PLoS One. 2010 Feb 2;5(2):e9019. doi: 10.1371/journal.pone.0009019 (PMC2814854; doi:10.1371/journal.pone.0009019)
Supplement: Table S7 — Thirty-five drugs arranged in order of decreasing proportional interaction at selected groups of receptors. The thirty-five drugs are arranged in order of decreasing proportional interaction at groups of receptors, based on the proportional breadth index Bp. The drugs with the greatest proportional interactions are found at the tops of the columns, and the drugs with the least proportional interactions are found at the bottoms of the columns. An entry of “ND” indicates that the statistic could not be calculated because some data is missing. The same data is also presented in Table S8. Receptors in a group are listed in the column heading, or are represented with the following abbreviations: • 5-HT - 5-HT1A, 5-HT1B, 5-HT1D, 5-HT1E, 5-HT2A, 5-HT2B, 5-HT2C, 5-HT5A, 5-HT6, 5-HT7 • 5-HT1 - 5-HT1A, 5-HT1B, 5-HT1D, 5-HT1E • Adrenergic - α1A, α1B, α2A, α2B, α2C, β1, β2 (0.37 MB DOC) [file pone.0009019.s010.doc]

| 5-HT | |  | 5-HT1 | |  | 5-HT2A, 5-HT2C | |  | 5-HT2A, 5-HT2B, 5-HT2C | |  | 5-HT6, 5-HT7 | |
| --- | --- | --- | --- | --- | --- | --- | --- | --- | --- | --- | --- | --- | --- |
| Bp | Drug | Bp | Drug | Bp | Drug | Bp | Drug | Bp | Drug |
| 0.848 | MEM | 0.455 | 5-MeO-DMT | 0.421 | TMA-2 | 0.788 | TMA-2 | 0.449 | EMDT |
| 0.820 | 2C-B-fly | 0.446 | RR-2b | 0.272 | DOET | 0.717 | MEM | 0.411 | 5-MeO-TMT |
| 0.804 | 5-MeO-DMT | 0.324 | 5-MeO-MIPT | 0.271 | DOB | 0.528 | Aleph-2 | 0.260 | 5-MeO-DMT |
| 0.788 | TMA-2 | 0.322 | 2C-B-fly | 0.228 | Aleph-2 | 0.495 | DOB | 0.192 | 5-MeO-MIPT |
| 0.784 | RR-2b | 0.318 | TMA | 0.225 | 2C-B-fly | 0.438 | 2C-B-fly | 0.168 | cis-2a |
| 0.747 | DOET | 0.312 | 2C-B | 0.222 | 4C-T-2 | 0.430 | DOET | 0.164 | LSD |
| 0.738 | Psilocin | 0.311 | 5-MeO-DIPT | 0.208 | 2C-T-2 | 0.395 | 4C-T-2 | 0.153 | SS-2c |
| 0.734 | 2C-B | 0.306 | Mescaline | 0.190 | 2C-E | 0.380 | 2C-T-2 | 0.151 | 6-F-DMT |
| 0.719 | LSD | 0.295 | Psilocin | 0.184 | 2C-B | 0.345 | DOM | 0.149 | DMT |
| 0.718 | 5-MeO-MIPT | 0.293 | LSD | 0.168 | MEM | 0.331 | MDA | 0.148 | RR-2b |
| 0.696 | DOB | 0.273 | 2C-E | 0.160 | DOI | 0.309 | 2C-E | 0.138 | Psilocin |
| 0.668 | 2C-T-2 | 0.268 | DOET | 0.129 | LSD | 0.307 | 2C-B | 0.131 | MEM |
| 0.666 | 2C-E | 0.225 | 2C-T-2 | 0.122 | SS-2c | 0.235 | Psilocin | 0.114 | 2C-B |
| 0.622 | Aleph-2 | 0.214 | DIPT | 0.112 | DOM | 0.216 | DOI | 0.108 | TMA |
| 0.615 | TMA | 0.195 | DPT | 0.108 | cis-2a | 0.210 | Mescaline | 0.098 | lisuride |
| 0.595 | 4C-T-2 | 0.190 | 6-F-DMT | 0.103 | DMT | 0.189 | DMT | 0.095 | 5-MeO-DIPT |
| 0.591 | DOM | 0.176 | DOM | 0.095 | Psilocin | 0.188 | TMA | 0.093 | MDA |
| 0.563 | 5-MeO-DIPT | 0.174 | lisuride | 0.074 | 5-MeO-MIPT | 0.185 | LSD | 0.085 | 2C-E |
| 0.544 | DMT | 0.149 | DMT | 0.074 | MDA | 0.182 | SS-2c | 0.072 | DPT |
| 0.516 | Mescaline | 0.130 | DOB | 0.073 | EMDT | 0.166 | cis-2a | 0.070 | DOM |
| 0.515 | MDA | 0.123 | DOI | 0.068 | TMA | 0.166 | 5-MeO-MIPT | 0.063 | 2C-T-2 |
| 0.510 | 6-F-DMT | 0.091 | MDA | 0.067 | 5-MeO-TMT | 0.158 | 5-MeO-DIPT | 0.062 | DIPT |
| 0.453 | lisuride | 0.078 | 4C-T-2 | 0.063 | 6-F-DMT | 0.147 | MDMA | 0.060 | 2C-B-fly |
| 0.426 | DPT | 0.062 | Aleph-2 | 0.055 | DPT | 0.140 | 6-F-DMT | 0.060 | DOB |
| 0.392 | DIPT | 0.000 | MEM | 0.054 | Ibogaine | 0.140 | DPT | 0.052 | DOI |
| 0.391 | DOI | 0.000 | TMA-2 | 0.053 | lisuride | 0.118 | lisuride | 0.051 | 4C-T-2 |
| 0.147 | MDMA | 0.000 | MDMA | 0.050 | RR-2b | 0.116 | DIPT | 0.049 | DOET |
| 0.000 | Salvinorin A | 0.000 | Salvinorin A | 0.041 | 5-MeO-DMT | 0.084 | RR-2b | 0.032 | Aleph-2 |
| ND | 5-MeO-TMT | ND | 5-MeO-TMT | 0.000 | 5-MeO-DIPT | 0.047 | 5-MeO-DMT | 0.000 | TMA-2 |
| ND | SS-2c | ND | SS-2c | 0.000 | Mescaline | 0.000 | Salvinorin A | 0.000 | Mescaline |
| ND | EMDT | ND | EMDT | 0.000 | DIPT | ND | EMDT | 0.000 | MDMA |
| ND | THC | ND | THC | 0.000 | MDMA | ND | 5-MeO-TMT | 0.000 | Salvinorin_A |
| ND | Morphine | ND | Morphine | 0.000 | Salvinorin A | ND | Ibogaine | ND | THC |
| ND | Ibogaine | ND | Ibogaine | ND | THC | ND | THC | ND | Morphine |
| ND | cis-2a | ND | cis-2a | ND | Morphine | ND | Morphine | ND | Ibogaine |

| Adrenergic | |  | α1A,α1B | |  | α2A,α2B, α2C | |  | β1, β2 | |
| --- | --- | --- | --- | --- | --- | --- | --- | --- | --- | --- |
| Bp | Drug | Bp | Drug | Bp | Drug | Bp | Drug |
| 0.485 | MDA | 0.090 | DMT | 0.485 | MDA | 0.166 | DOM |
| 0.409 | DOM | 0.083 | DPT | 0.326 | Mescaline | 0.149 | Aleph-2 |
| 0.393 | lisuride | 0.050 | 6-F-DMT | 0.316 | MDMA | 0.145 | 4C-T-2 |
| 0.326 | Mescaline | 0.039 | lisuride | 0.281 | lisuride | 0.119 | DOI |
| 0.316 | MDMA | 0.035 | DOM | 0.207 | DOM | 0.083 | DOB |
| 0.305 | DOI | 0.021 | cis-2a | 0.206 | 2C-E | 0.073 | lisuride |
| 0.273 | DMT | 0.016 | LSD | 0.186 | DOI | 0.061 | DOET |
| 0.223 | DPT | 0.006 | SS-2c | 0.183 | DMT | 0.042 | SS-2c |
| 0.221 | DOET | 0.004 | RR-2b | 0.170 | 2C-B | 0.038 | 2C-T-2 |
| 0.184 | Aleph-2 | 0.000 | MDA | 0.161 | DOET | 0.028 | cis-2a |
| 0.182 | 2C-T-2 | 0.000 | Mescaline | 0.151 | TMA | 0.018 | LSD |
| 0.170 | DOB | 0.000 | MDMA | 0.144 | 2C-T-2 | 0.000 | MDA |
| 0.151 | TMA | 0.000 | DOI | 0.140 | DPT | 0.000 | Mescaline |
| 0.146 | 6-F-DMT | 0.000 | DOET | 0.139 | 5-MeO-MIPT | 0.000 | MDMA |
| 0.145 | 4C-T-2 | 0.000 | Aleph-2 | 0.135 | DIPT | 0.000 | DMT |
| 0.139 | 5-MeO-MIPT | 0.000 | 2C-T-2 | 0.133 | 5-MeO-DIPT | 0.000 | TMA |
| 0.135 | DIPT | 0.000 | DOB | 0.096 | 6-F-DMT | 0.000 | DPT |
| 0.133 | 5-MeO-DIPT | 0.000 | TMA | 0.094 | 2C-B-fly | 0.000 | 5-MeO-MIPT |
| 0.094 | 2C-B-fly | 0.000 | 4C-T-2 | 0.087 | DOB | 0.000 | DIPT |
| 0.052 | 5-MeO-DMT | 0.000 | 5-MeO-MIPT | 0.052 | 5-MeO-DMT | 0.000 | 5-MeO-DIPT |
| 0.047 | Psilocin | 0.000 | DIPT | 0.047 | Psilocin | 0.000 | 6-F-DMT |
| 0.000 | MEM | 0.000 | 5-MeO-DIPT | 0.035 | Aleph-2 | 0.000 | 2C-B-fly |
| 0.000 | TMA-2 | 0.000 | 2C-B-fly | 0.000 | 4C-T-2 | 0.000 | 5-MeO-DMT |
| ND | EMDT | 0.000 | 5-MeO-DMT | 0.000 | MEM | 0.000 | Psilocin |
| ND | 5-MeO-TMT | 0.000 | Psilocin | 0.000 | TMA-2 | 0.000 | MEM |
| ND | RR-2b | 0.000 | MEM | ND | cis-2a | 0.000 | TMA-2 |
| ND | cis-2a | 0.000 | TMA-2 | ND | LSD | 0.000 | Salvinorin A |
| ND | LSD | 0.000 | 2C-B | ND | SS-2c | ND | 2C-E |
| ND | SS-2c | 0.000 | 2C-E | ND | RR-2b | ND | 2C-B |
| ND | 2C-B | 0.000 | Salvinorin A | ND | Salvinorin A | ND | RR-2b |
| ND | 2C-E | ND | EMDT | ND | EMDT | ND | EMDT |
| ND | Salvinorin A | ND | 5-MeO-TMT | ND | 5-MeO-TMT | ND | 5-MeO-TMT |
| ND | Ibogaine | ND | Ibogaine | ND | Ibogaine | ND | Ibogaine |
| ND | THC | ND | THC | ND | THC | ND | THC |
| ND | Morphine | ND | Morphine | ND | Morphine | ND | Morphine |

| D1, D2, D3, D4, D5 | |  | M1, M2, M3, M4, M5 | |  | H1, H2 | |  | σ1, σ2 | |
| --- | --- | --- | --- | --- | --- | --- | --- | --- | --- | --- |
| Bp | Drug | Bp | Drug | Bp | Drug | Bp | Drug |
| 0.244 | cis-2a | 0.242 | MDMA | 0.212 | TMA-2 | 0.257 | Ibogaine |
| 0.203 | SS-2c | 0.175 | DOI | 0.099 | 6-F-DMT | 0.234 | TMA |
| 0.199 | RR-2b | 0.084 | 2C-B-fly | 0.066 | DPT | 0.152 | MEM |
| 0.185 | LSD | 0.068 | 2C-T-2 | 0.061 | DIPT | 0.144 | DIPT |
| 0.161 | Psilocin | 0.064 | 2C-E | 0.033 | DOI | 0.120 | 5-MeO-DIPT |
| 0.140 | lisuride | 0.038 | 2C-B | 0.016 | 5-MeO-MIPT | 0.100 | 4C-T-2 |
| 0.138 | 6-F-DMT | 0.033 | DOB | 0.006 | DOB | 0.071 | DPT |
| 0.115 | 5-MeO-DMT | 0.018 | Aleph-2 | 0.001 | 2C-B-fly | 0.063 | Aleph-2 |
| 0.076 | 4C-T-2 | 0.000 | lisuride | 0.000 | MDMA | 0.037 | 5-MeO-MIPT |
| 0.072 | DPT | 0.000 | 6-F-DMT | 0.000 | 2C-T-2 | 0.034 | DOI |
| 0.069 | DMT | 0.000 | 5-MeO-DMT | 0.000 | 2C-E | 0.032 | DOET |
| 0.064 | 2C-E | 0.000 | 4C-T-2 | 0.000 | 2C-B | 0.028 | DMT |
| 0.063 | DIPT | 0.000 | DPT | 0.000 | Aleph-2 | 0.024 | 6-F-DMT |
| 0.044 | 2C-T-2 | 0.000 | DMT | 0.000 | 4C-T-2 | 0.022 | DOB |
| 0.040 | DOB | 0.000 | DIPT | 0.000 | Mescaline | 0.015 | 2C-T-2 |
| 0.038 | 5-MeO-MIPT | 0.000 | 5-MeO-MIPT | 0.000 | 5-MeO-DIPT | 0.000 | 2C-B-fly |
| 0.037 | Aleph-2 | 0.000 | Mescaline | 0.000 | MEM | 0.000 | 2C-B |
| 0.033 | 2C-B | 0.000 | 5-MeO-DIPT | 0.000 | Psilocin | 0.000 | Mescaline |
| 0.016 | DOI | 0.000 | MEM | 0.000 | DOM | 0.000 | Psilocin |
| 0.000 | DOM | 0.000 | Salvinorin A | 0.000 | DOET | 0.000 | DOM |
| 0.000 | DOET | ND | cis-2a | 0.000 | TMA | 0.000 | 5-MeO-DMT |
| 0.000 | MDA | ND | SS-2c | 0.000 | EMDT | ND | TMA-2 |
| 0.000 | Mescaline | ND | RR-2b | 0.000 | 5-MeO-TMT | ND | MDMA |
| 0.000 | MDMA | ND | LSD | ND | lisuride | ND | 2C-E |
| 0.000 | TMA | ND | Psilocin | ND | 5-MeO-DMT | ND | EMDT |
| 0.000 | 5-MeO-DIPT | ND | DOM | ND | DMT | ND | 5-MeO-TMT |
| 0.000 | MEM | ND | DOET | ND | Salvinorin A | ND | lisuride |
| 0.000 | TMA-2 | ND | MDA | ND | cis-2a | ND | Salvinorin A |
| 0.000 | Salvinorin A | ND | TMA | ND | SS-2c | ND | cis-2a |
| 0.000 | EMDT | ND | TMA-2 | ND | RR-2b | ND | SS-2c |
| 0.000 | 5-MeO-TMT | ND | EMDT | ND | LSD | ND | RR-2b |
| ND | 2C-B-fly | ND | 5-MeO-TMT | ND | MDA | ND | LSD |
| ND | Ibogaine | ND | Ibogaine | ND | Ibogaine | ND | MDA |
| ND | THC | ND | THC | ND | THC | ND | THC |
| ND | Morphine | ND | Morphine | ND | Morphine | ND | Morphine |

| SERT, NET, DAT | |  | DOR, KOR, MOR | |  | CB1, CB2 | |
| --- | --- | --- | --- | --- | --- | --- | --- |
| Bp | Drug | Bp | Drug | Bp | Drug |
| 0.092 | DPT | 1.000 | Salvinorin A | 1.000 | THC |
| 0.085 | DIPT | 1.000 | Morphine | 0.000 | 2C-B-fly |
| 0.076 | 5-MeO-DIPT | 0.177 | Ibogaine | 0.000 | DPT |
| 0.055 | 5-MeO-TMT | 0.000 | DPT | 0.000 | DIPT |
| 0.052 | 6-F-DMT | 0.000 | DIPT | 0.000 | 5-MeO-DIPT |
| 0.046 | DOI | 0.000 | 5-MeO-DIPT | 0.000 | DOI |
| 0.032 | DMT | 0.000 | 5-MeO-TMT | 0.000 | Psilocin |
| 0.026 | Psilocin | 0.000 | DOI | 0.000 | Aleph-2 |
| 0.022 | Aleph-2 | 0.000 | Psilocin | 0.000 | DOB |
| 0.020 | 5-MeO-DMT | 0.000 | Aleph-2 | 0.000 | TMA |
| 0.014 | 5-MeO-MIPT | 0.000 | 5-MeO-MIPT | 0.000 | MEM |
| 0.006 | DOB | 0.000 | DOB | 0.000 | 4C-T-2 |
| 0.000 | TMA | 0.000 | TMA | 0.000 | DOET |
| 0.000 | MEM | 0.000 | MEM | 0.000 | 2C-T-2 |
| 0.000 | 4C-T-2 | 0.000 | 4C-T-2 | 0.000 | 2C-B |
| 0.000 | DOET | 0.000 | DOET | 0.000 | Mescaline |
| 0.000 | 2C-T-2 | 0.000 | 2C-T-2 | 0.000 | DOM |
| 0.000 | 2C-B-fly | 0.000 | 2C-B-fly | 0.000 | 2C-E |
| 0.000 | 2C-B | 0.000 | 2C-B | 0.000 | 6-F-DMT |
| 0.000 | Mescaline | 0.000 | Mescaline | 0.000 | DMT |
| 0.000 | DOM | 0.000 | DOM | 0.000 | 5-MeO-DMT |
| 0.000 | TMA-2 | 0.000 | 2C-E | 0.000 | lisuride |
| 0.000 | MDMA | 0.000 | EMDT | 0.000 | MDA |
| 0.000 | 2C-E | 0.000 | cis-2a | ND | Salvinorin A |
| 0.000 | EMDT | 0.000 | SS-2c | ND | Morphine |
| 0.000 | lisuride | 0.000 | RR-2b | ND | Ibogaine |
| 0.000 | cis-2a | 0.000 | LSD | ND | 5-MeO-TMT |
| 0.000 | SS-2c | ND | 6-F-DMT | ND | 5-MeO-MIPT |
| 0.000 | RR-2b | ND | DMT | ND | EMDT |
| 0.000 | LSD | ND | 5-MeO-DMT | ND | cis-2a |
| 0.000 | MDA | ND | TMA-2 | ND | SS-2c |
| ND | Ibogaine | ND | MDMA | ND | RR-2b |
| ND | Salvinorin A | ND | lisuride | ND | LSD |
| ND | THC | ND | MDA | ND | TMA-2 |
| ND | Morphine | ND | THC | ND | MDMA |
