# Supplementary material for: Psychedelics and the Human Receptorome
Source: PLoS One. 2010 Feb 2;5(2):e9019. doi: 10.1371/journal.pone.0009019 (PMC2814854; doi:10.1371/journal.pone.0009019)
Supplement: Table S8 — Table of Bp values at individual or groups of receptors for thirty-five drugs. Table S8 presents the proportional breadth statistic Bp for each drug at each of forty-two sites, and for sixteen groups of related sites. A useful way to work with the table is to choose a column, and sort the data on that column (click “Data, “Sort,” select “Header row,” choose the column from the “Sort by” drop down and select “Descending,” finally clicking “OK”). Missing values are reported as “ND.” Receptors in a group are listed in the column headings using the following abbreviations: • Bsq - square root of sum of squares of npKi values across forty-two receptors • 5ht - 5-HT1A, 5-HT1B, 5-HT1D, 5-HT1E, 5-HT2A, 5-HT2B, 5-HT2C, 5-HT5A, 5-HT6, 5-HT7 • 5ht1 - 5-HT1A, 5-HT1B, 5-HT1D, 5-HT1E • 5ht2 - 5-HT2A, 5-HT2B, 5-HT2C • 5ht2[ac] - 5-HT2A, 5-HT2C • 5ht[67] - 5-HT6, 5-HT7 • D[1–5] - D1, D2, D3, D4, D5 • ∧[AB] - α1A, α1B, α2A, α2B, α2C, β1, β2 • Alpha1 - α1A, α1B • Alpha2 - α2A, α2B, α2C • Beta - β1, β2 • M[1–5] - M1, M2, M3, M4, M5 • Sigma - σ1, σ 2 • H[12] - H1, H2 • T$ - SERT, DAT, NET • [DKM]OR - DOR, KOR, MOR • CB[12] - CB1, CB2 (0.04 MB XLS) [file pone.0009019.s011.xls]

## Sheet: BreadthPro
Drug	Bsq	5ht	5ht1	5ht2	5ht2[ac]	5ht[67]	D[1-5]	^[AB]	Alpha1	Alpha2	Beta	M[1-5]	Sigma	H[12]	T$	[DKM]OR	CB[12]	5ht2a	5ht2c	5ht2b	5ht1a	5ht1b	5ht1d	5ht1e	5ht5a	5ht6	5ht7	D1	D2	D3	D4	D5	Alpha1A	Alpha1B	Alpha2A	Alpha2B	Alpha2C	Beta1	Beta2	SERT	DAT	NET	Imidazoline1	Sigma1	Sigma2	DOR	KOR	MOR	M1
DOM	8.29457	0.591374	0.176244	0.345043	0.112484	0.070087	0	0.408626	0.0353932	0.20729	0.165942	ND	0	0	0	0	0	0.0811483	0.031336	0.232559	0.0329298	0	0.10978	0.0335345	0	0.0194491	0.0506379	0	0	0	0	0	0.0353932	0	0.0772131	0.0657469	0.0643302	0	0.165942	0	0	0	0	0	0	0	0	0	0
lisuride	11.8799	0.452631	0.173724	0.117777	0.0533792	0.0979642	0.140014	0.393086	0.0390657	0.28109	0.072931	0	ND	ND	0	ND	0	0.0533792	0	0.0643974	0.113369	0.0366077	0	0.0237474	0.063166	0.0484081	0.0495562	0	0.0497976	0.0128092	0.0594801	0.0179272	0.0308375	0.00822821	0.0735502	0.101142	0.106397	0.0465559	0.0263751	0	0	0	0	ND	ND	ND	0	0	0
TMA-2	6.60381	0.788038	0	0.788038	0.421152	0	0	0	0	0	0	ND	ND	0.211962	0	ND	ND	0.26853	0.152623	0.366885	0	0	0	0	0	0	0	0	0	0	0	0	0	0	0	0	0	0	0	0	0	0	ND	ND	ND	ND	ND	ND	ND
TMA	11.5484	0.614939	0.318308	0.188151	0.0681803	0.10848	0	0.151247	0	0.151247	0	ND	0.233813	0	0	0	0	0	0.0681803	0.119971	0.0894212	0.0778658	0.0765894	0.0744316	0	0	0.10848	0	0	0	0	0	0	0	0.0847511	0	0.0664962	0	0	0	0	0	0	0.116907	0.116907	0	0	0	ND
LSD	13.1199	0.719479	0.293139	0.185073	0.128741	0.164428	0.18538	ND	0.0162324	ND	0.0176	ND	ND	ND	0	0	ND	0.0727192	0.0560216	0.0563324	0.0807287	0.0929515	0.0794874	0.0399714	0.0768388	0.0817922	0.0826361	0.0318944	0.0377547	0.0580001	0.0332206	0.0245097	0.0137575	0.0024749	0.0498805	ND	ND	0.0111721	0.00642784	0	0	0	ND	ND	ND	0	0	0	ND
2C-B	11.3654	0.734085	0.31218	0.307456	0.183591	0.114449	0.0325285	ND	0	0.170386	ND	0.0380052	0	0	0	0	0	0.105378	0.0782129	0.123866	0.0584896	0.0749563	0.106578	0.0721564	0	0.0533575	0.0610915	0	0.0198824	0.0126462	0	0	0	0	0.0539827	0.0412257	0.075178	ND	ND	0	0	0	0.0249944	0	0	0	0	0	0
DMT	13.3372	0.543748	0.149364	0.188914	0.10296	0.149477	0.0692157	0.272615	0.0900305	0.182585	0	0	0.0278373	ND	0.0315474	ND	0	0.0373032	0.0656569	0.0859538	0	0	0.0887605	0.0606034	0.0559929	0.05953	0.0899473	0.0692157	0	0	0	0	0.0409887	0.0490418	0.042471	0.070087	0.0700269	0	0	0.0315474	0	0	0.0550364	0.0278373	0	ND	0	ND	0
5-MeO-TMT	8.40693	ND	ND	ND	0.0668674	0.411468	0	ND	ND	ND	ND	ND	ND	0	0.0550966	0	ND	0	0.0668674	ND	0.171067	ND	0.161664	0.0900571	0.0437799	0.226384	0.185085	0	0	0	0	0	ND	ND	ND	ND	ND	ND	ND	0	0	0.0550966	ND	ND	ND	0	0	0	ND
2C-E	11.6061	0.665754	0.2727	0.308504	0.189723	0.0845502	0.0644149	ND	0	0.205642	ND	0.064189	ND	0	0	0	0	0.104799	0.0849241	0.118781	0.0629567	0.0666684	0.092778	0.0502966	0	0.0275605	0.0569897	0	0.0261287	0.0382862	0	0	0	0	0.0544966	0.0630671	0.0880786	0	ND	0	0	0	0	ND	0	0	0	0	0
SS-2c	8.84768	ND	ND	0.181718	0.121526	0.15257	0.20316	ND	0.00577798	ND	0.0420924	ND	ND	ND	0	0	ND	0.0686835	0.0528424	0.0601921	0.204391	0.132602	ND	0.0172327	0.0599262	0.0760969	0.0764735	0.016505	0.038462	0.101869	0.0336104	0.0127136	0.00577798	0	ND	ND	ND	0.037897	0.00419542	0	0	0	ND	ND	ND	0	0	0	ND
5-MeO-MIPT	11.0001	0.71828	0.32369	0.165695	0.0744521	0.192071	0.0375247	0.138788	0	0.138788	0	0	0.0373926	0.0163592	0.0136062	0	ND	0.0491353	0.0253168	0.0912433	0.132229	0.0562433	0.115457	0.0197612	0.0368234	0.0731587	0.118912	0	0	0.0238054	0.0137192	0	0	0	0.0669793	0.0286296	0.0431787	0	0	0.0136062	0	0	0.0380497	0	0.0373926	0	0	0	0
EMDT	7.22119	ND	ND	ND	0.0726549	0.449444	0	ND	ND	ND	ND	ND	ND	0	0	0	ND	0	0.0726549	ND	0.169577	ND	0.144155	0.11872	0.0454495	0.306833	0.142611	0	0	0	0	0	ND	ND	ND	ND	ND	ND	ND	0	0	0	ND	ND	ND	0	0	0	ND
DOET	9.32136	0.747067	0.268192	0.429549	0.272077	0.0493261	0	0.221263	0	0.160688	0.0605757	ND	0.03167	0	0	0	0	0.159456	0.112621	0.157472	0.184145	0.0336926	0.0205989	0.0297546	0	0	0.0493261	0	0	0	0	0	0	0	0.0484695	0.0662787	0.0459395	0.0225816	0.0379941	0	0	0	0	0.0157016	0.0159684	0	0	0	ND
Mescaline	8.6694	0.515687	0.30565	0.210037	0	0	0	0.326444	0	0.326444	0	0	0	0	0	0	0	0	0	0.210037	0.173133	0	0	0.132517	0	0	0	0	0	0	0	0	0	0	0.113561	0	0.212883	0	0	0	0	0	0.157869	0	0	0	0	0	0
MDA	7.89383	0.515385	0.0911799	0.331066	0.0742958	0.0931391	0	0.484615	0	0.484615	0	ND	ND	ND	0	ND	0	0	0.0742958	0.25677	0.0911799	0	0	0	0	0	0.0931391	0	0	0	0	0	0	0	0.120504	0.156219	0.207892	0	0	0	0	0	0	ND	ND	ND	0	ND	ND
2C-T-2	9.65316	0.668306	0.225204	0.379638	0.207934	0.0634637	0.043649	0.182133	0	0.143828	0.0383048	0.0678261	0.0152081	0	0	0	0	0.108329	0.0996049	0.171704	0.0517988	0.036527	0.0868097	0.0500688	0	0.0290035	0.0344602	0	0.0190335	0.0246155	0	0	0	0	0.0393551	0.0342362	0.0702369	0.00711535	0.0311894	0	0	0	0.022878	0.0152081	0	0	0	0	0
4C-T-2	9.63624	0.594907	0.0783915	0.394509	0.222202	0.0512309	0.0761613	0.144861	0	0	0.144861	0	0.100359	0	0	0	0	0.119151	0.10305	0.172308	0.044673	0	0	0.0337184	0.0707758	0	0.0512309	0	0	0.0761613	0	0	0	0	0	0	0	0	0.144861	0	0	0	0.0837119	0.100359	0	0	0	0	0
6-F-DMT	14.1945	0.510473	0.190146	0.140134	0.0633207	0.150988	0.137695	0.146312	0.0498571	0.0964548	0	0	0.0242375	0.099013	0.0523616	ND	0	0.0302977	0.033023	0.0768131	0.0393096	0.0467893	0.066657	0.0373904	0.0292046	0.0794112	0.0715773	0.0353825	0.0341377	0.0302878	0.0250297	0.0128574	0.0498571	0	0	0.0444933	0.0519614	0	0	0.0523616	0	0	0.0299077	0.0122321	0.0120053	ND	ND	ND	0
2C-B-fly	8.67079	0.820224	0.321921	0.437994	0.225179	0.0603091	ND	0.0941185	0	0.0941185	0	0.0840762	0	0.000502393	0	0	2.09976e-08	0.111074	0.114104	0.212815	0.0424572	0.0378889	0.192887	0.0486882	0	0.0420552	0.0182539	0.000888787	0.000189893	ND	0	0	0	0	0.0427832	0.0178644	0.033471	0	0	0	0	0	0	0	0	0	0	0	0.0174652
MDMA	9.49815	0.147098	0	0.147098	0	0	0	0.315971	0	0.315971	0	0.24153	ND	0	0	ND	ND	0	0	0.147098	0	0	0	0	0	0	0	0	0	0	0	0	0	0	0.0957048	0.10585	0.114416	0	0	0	0	0	0.177354	ND	ND	ND	0	0	0
THC	5.50457	ND	ND	ND	ND	ND	ND	ND	ND	ND	ND	ND	ND	ND	ND	ND	1	ND	ND	ND	ND	ND	ND	ND	ND	ND	ND	ND	ND	ND	ND	ND	ND	ND	ND	ND	ND	ND	ND	ND	ND	ND	ND	ND	ND	ND	ND	ND	ND
Psilocin	10.7069	0.737963	0.294731	0.235054	0.095485	0.138432	0.1613	0.046841	0	0.046841	0	ND	0	0	0.0264666	0	0	0.0399904	0.0554946	0.139569	0.072128	0.0417527	0.100992	0.0798583	0.0697449	0.0692012	0.069231	0.099258	0	0.0620425	0	0	0	0	0.0161726	0.0214455	0.00922291	0	0	0.0264666	0	0	0.0274294	0	0	0	0	0	0
5-MeO-DIPT	9.84762	0.563279	0.31088	0.157625	0	0.0947741	0	0.132531	0	0.132531	0	0	0.119637	0	0.0762126	0	0	0	0	0.157625	0.16499	0.0599509	0.085939	0	0	0	0.0947741	0	0	0	0	0	0	0	0	0.0593066	0.0732242	0	0	0.0762126	0	0	0.108341	0.0475238	0.0721136	0	0	0	0
Morphine	4.62598	ND	ND	ND	ND	ND	ND	ND	ND	ND	ND	ND	ND	ND	ND	1	ND	ND	ND	ND	ND	ND	ND	ND	ND	ND	ND	ND	ND	ND	ND	ND	ND	ND	ND	ND	ND	ND	ND	ND	ND	ND	ND	ND	ND	0.0241948	0.228132	0.747673	ND
Salvinorin_A	4	0	0	0	0	0	0	ND	0	ND	0	0	ND	ND	ND	1	ND	0	0	0	0	0	0	0	0	0	0	0	0	0	0	0	0	0	ND	ND	ND	0	0	0	0	ND	ND	ND	ND	0	1	0	0
RR-2b	9.80036	0.784248	0.445639	0.0838263	0.0498346	0.148353	0.198626	ND	0.00357668	ND	ND	ND	ND	ND	0	0	ND	0.0222615	0.0275731	0.0339916	0.133814	0.166585	0.0965843	0.0486563	0.10643	0.0660795	0.0822734	0.032508	0.0367955	0.0601408	0.0448482	0.0243336	0.00357668	0	ND	ND	ND	ND	ND	0	0	0	ND	ND	ND	0	0	0	ND
DPT	13.3032	0.426172	0.194998	0.139816	0.0547876	0.0717744	0.0723447	0.222599	0.0830379	0.139561	0	0	0.0711043	0.0655185	0.0923881	0	0	0.024705	0.0300827	0.0850287	0.0904079	0.0373432	0.0415246	0.025722	0.0195831	0.0192362	0.0525383	0	0.013337	0.0316999	0.0273078	0	0.0369602	0.0460777	0.0456369	0.0499043	0.0440195	0	0	0.0618086	0.0305795	0	0.0498742	0.0476471	0.0234573	0	0	0	0
Aleph-2	7.29733	0.622373	0.062175	0.52833	0.227866	0.0318677	0.0374894	0.183517	0	0.0350031	0.148514	0.017715	0.0626078	0	0.0220747	0	0	0.110258	0.117609	0.300464	0.0180488	0.0150468	0.0194941	0.00958534	0	0.00984658	0.0220212	0	0	0.0374894	0	0	0	0	0.00364334	0.0101908	0.021169	0.00260042	0.145914	0.0220747	0	0	0.0542229	0.0626078	0	0	0	0	0
DIPT	10.2096	0.392274	0.213838	0.11622	0	0.0622156	0.0628592	0.134869	0	0.134869	0	0	0.143964	0.0612499	0.0852702	0	0	0	0	0.11622	0.153499	0	0.0603391	0	0	0	0.0622156	0	0	0.0628592	0	0	0	0	0	0.0660109	0.0688577	0	0	0.0852702	0	0	0.119514	0.0766283	0.067336	0	0	0	0
5-MeO-DMT	9.00172	0.803633	0.455112	0.0471781	0.0413115	0.259702	0.114811	0.0519926	0	0.0519926	0	0	0	ND	0.019981	ND	0	0.0117399	0.0295716	0.00586659	0.197456	0.0716492	0.149404	0.0366034	0.041641	0.0918767	0.167825	0.0698094	0.00652363	0.0308811	0.00759705	0	0	0	0.0123976	0.00906698	0.030528	0	0	0.0116315	0	0.00834955	0.00958209	0	0	ND	0	ND	0
DOB	8.4365	0.696373	0.13039	0.495336	0.270536	0.0601126	0.0398222	0.170192	0	0.0872071	0.0829847	0.032881	0.021954	0.00559539	0.00611476	0	0	0.146351	0.124185	0.2248	0.0197135	0.0367642	0.0449144	0.0289982	0.0105341	0.0101021	0.0500105	0	0	0.0398222	0	0	0	0	0.0129766	0.0278229	0.0464075	0.0204467	0.062538	0.00611476	0	0	0.0270681	0.021954	0	0	0	0	0
DOI	13.2083	0.39064	0.122718	0.215956	0.159634	0.0519652	0.0160751	0.305073	0	0.186235	0.118838	0.175343	0.0336526	0.0334605	0.0457566	0	0	0.0679219	0.0917117	0.0563228	0.0307112	0	0.0515943	0.0404127	0	0.0312779	0.0206873	0.0160751	0	0	0	0	0	0	0.0824824	0.0561336	0.0476186	0.0478526	0.0709853	0.0457566	0	0	0	0.0171183	0.0165343	0	0	0	0.02841
Ibogaine	9.3512	ND	ND	ND	0.0535206	ND	ND	ND	ND	ND	ND	ND	0.257189	ND	ND	0.176618	ND	0.0535206	0	ND	0	0	0	ND	ND	ND	ND	0	0	0.0246702	ND	ND	ND	ND	ND	ND	ND	0	ND	0.146118	0.104106	ND	ND	0.074217	0.182972	0	0.0948382	0.08178	0.0440193
cis-2a	11.2869	ND	ND	0.166425	0.108424	0.16831	0.244321	ND	0.0210721	ND	0.0281926	ND	ND	ND	0	0	ND	0.065514	0.0429102	0.0580009	0.125594	0.112962	ND	0.0337188	0.0777337	0.0829695	0.0853408	0.0312805	0.0559861	0.0938983	0.0487201	0.0144359	0.0210721	0	ND	ND	ND	0.0243689	0.00382362	0	0	0	ND	ND	ND	0	0	0	ND
MEM	5.39874	0.848125	0	0.717007	0.168054	0.131117	0	0	0	0	0	0	0.151875	0	0	0	0	0.168054	0	0.548953	0	0	0	0	0	0	0.131117	0	0	0	0	0	0	0	0	0	0	0	0	0	0	0	0	0.151875	0	0	0	0	0
[truncated: 10 more columns]
